# Supplementary material
Source: publisher site journal article supplement (https://www.dovepress.com/article/409663)
Supplement: Supplementary file 1 [file get_supplementary_file.php]

## Appendix 1: Calculation of the Air Quality Index

### Step 1:

Following the eco-environmental standards issued by the Chinese government, we calculate the  $IAQI_p$  of each pollutant item  $P$  as follows.

$$IAQI_p = \frac{IAQI_{Hi} - IAQI_{Lo}}{BP_{Hi} - BP_{Lo}} (C_p - BP_{Lo}) + IAQI_{Lo} \quad (1)$$

$IAQI_p$  = sub-index AQI of the pollutant item  $P$ ;

$C_p$  = mass concentration of the pollutant item  $P$ ;

$BP_{Hi(lo)}$  = high (low) value of the pollutant concentration limit close to  $C_p$ ;

$IAQI_{Hi(lo)}$  = air quality sub-index corresponding to  $BP_{Lo}$  and  $BP_{Hi}$ , respectively.

Among them,  $BP_{Hi}$ ,  $BP_{Lo}$ ,  $IAQI_{Lo}$ , and  $IAQI_{Hi}$  are constants, which can be found on the website of State Environmental Protection Administration: [http://www.mee.gov.cn/ywgz/fgbz/bz/bzwb/jcffbz/201203/t20120302\\_224166.shtml](http://www.mee.gov.cn/ywgz/fgbz/bz/bzwb/jcffbz/201203/t20120302_224166.shtml).

For example, if the detected  $SO_2$  (24h) concentration is  $500\mu\text{g}/\text{m}^3$ , the corresponding value of each variable is found on the website (i.e.,  $IAQI_{Hi}=200$ ,  $IAQI_{Lo}=150$ ,  $BP_{Hi}=800$ ,  $BP_{Lo}=475$ ). The calculation process is as follows:

$$IAQI_{SO_2} = \frac{200-150}{800-475} * (500 - 475) + 150 = 154(\text{Round Numbers})$$

### Step 2:

After calculating the sub-index AQI of each pollutant item, we choose the largest value as the final AQI index.

$$AQI = \max\{IAQI_1, IAQI_2, IAQI_3, \dots, IAQI_n\} \quad (2)$$
